# Supplementary material for: Recent Advances in Sorbicillinoids from Fungi and Their Bioactivities (Covering 2016–2021)
Source: MDPI journal article supplement (doi:10.3390/jof8010062), 2022-01-07
Supplement: s1 [file s1]

# Supplementary Materials: Recent Advances in Sorbicillinoids from Fungi and Their Bioactivities (Covering 2016-2021)

Xuwen Hou, Xuping Zhang, Mengyao Xue, Zhitong Zhao, Huizhen Zhang, Dan Xu, Daowan Lai and Ligang Zhou \*

State Key Laboratory of Agrobiotechnology, Department of Plant Pathology, College of Plant Protection, China Agricultural University, Beijing 100193, China; xwhou@cau.edu.cn (X.H.); zhangxuping5@cau.edu.cn (X.Z.); mengyaoxue@cau.edu.cn (M.X.); zhitongzhao@cau.edu.cn (Z.Z.); huizhenzhang@cau.edu.cn (H.Z.); cauxudan@cau.edu.cn (D.X.); dwlai@cau.edu.cn (D.L.)

\* Correspondence: lgzhou@cau.edu.cn; Tel.: +86-10-6273-1199

## Contents

|                                                                                                             |   |
|-------------------------------------------------------------------------------------------------------------|---|
| <b>Table S1.</b> Occurrence of the monomeric sorbicillinoids (5–38) in fungi. ....                          | 2 |
| <b>Table S2.</b> Occurrence of the bisorbicillinoids (39–59) in fungi. ....                                 | 3 |
| <b>Table S3.</b> Occurrence of the hybrid sorbicillinoids (61–73) in fungi. ....                            | 4 |
| <b>Table S4.</b> Cytotoxic activity of the screened sorbicillinoids from fungi. ....                        | 4 |
| <b>Table S5.</b> Antibacterial activity of the screened sorbicillinoids from fungi. ....                    | 5 |
| <b>Table S6.</b> Antifungal activity of the screened sorbicillinoids from fungi. ....                       | 5 |
| <b>Table S7.</b> Anti-inflammatory activity of the screened sorbicillinoids from fungi. ....                | 6 |
| <b>Table S8.</b> Phytotoxic activity of the screened sorbicillinoids from fungi. ....                       | 6 |
| <b>Table S9.</b> $\alpha$ -Glucosidase inhibitory activity of the screened sorbicillinoids from fungi. .... | 7 |
| <b>Table S10.</b> Other biological activities of the screened sorbicillinoids from fungi. ....              | 7 |
| Supplementary References .....                                                                              | 7 |

**Table S1.** Occurrence of the monomeric sorbicillinoids (5–38) in fungi.

| <b>Sorbicillinoid</b>                                          | <b>Fungus and its Origin</b>                                                                    | <b>Ref.</b> |
|----------------------------------------------------------------|-------------------------------------------------------------------------------------------------|-------------|
| 2-Deoxysohirnone C (5)                                         | <i>Penicillium</i> sp. GD6 from mangrove <i>Bruguiera gymnorrhiza</i>                           | [1]         |
|                                                                | <i>Penicillium</i> sp. SCSIO06871 from the deep-sea sediment                                    | [2]         |
| 2',3'-Dihydro-epoxysorbicillinol (6)                           | <i>Trichoderma longibrachiatum</i> SFC100166 isolated from the foreshore soil                   | [3]         |
| (4E)-1-(4,6-Dihydroxy-5-methylp yridin-3-yl)hex-4-en-1-one (7) | <i>Penicillium</i> sp. DM815 from the rhizosphere soil of a mangrove <i>Hibiscus tiliaceus</i>  | [4]         |
| Saturnispol E (8)                                              | <i>Trichoderma saturnisporum</i> DI-IA from the marine sponge <i>Dictyonella incisa</i>         | [5]         |
| Saturnispol F (9)                                              | <i>Trichoderma saturnisporum</i> DI-IA from the marine sponge <i>Dictyonella incisa</i>         | [5]         |
| Saturnispol G (10)                                             | <i>Trichoderma saturnisporum</i> DI-IA from the marine sponge <i>Dictyonella incisa</i>         | [5]         |
| Saturnispol H = 5-Demethylustilopyrone A (11)                  | <i>Trichoderma saturnisporum</i> DI-IA from the marine sponge <i>Dictyonella incisa</i>         | [5]         |
|                                                                | Rice false smut pathogen <i>Ustilaginoidea virens</i>                                           | [6]         |
| Ustilopyrone A (12)                                            | Rice false smut pathogen <i>Ustilaginoidea virens</i>                                           | [6]         |
| Ustilopyrone B (13)                                            | Rice false smut pathogen <i>Ustilaginoidea virens</i>                                           | [6]         |
|                                                                | <i>Penicillium</i> sp. SCSIO06871 from the deep-sea sediment                                    | [2]         |
| Scipyrone K (14)                                               | Deep-sea-derived fungus <i>Phialocephala</i> sp. FL30r                                          | [7]         |
| 5-Hydroxy-dihydrodemethylsorbicillin (15)                      | <i>Penicillium</i> sp. SCSIO06871 from the deep-sea sediment                                    | [2]         |
| Sorbicillpyrone A (16)                                         | <i>Penicillium</i> sp. SCSIO06871 from the deep-sea sediment                                    | [2]         |
| 5,6-Dehydrovertinolide (17)                                    | <i>Penicillium</i> sp. SCSIO06871 from the deep-sea sediment                                    | [2]         |
| Trichosorbicillin B (18)                                       | Marine-derived <i>Trichoderma reesei</i> 4670 from a sponge                                     | [8]         |
| Trichosorbicillin C (19)                                       | Marine-derived <i>Trichoderma reesei</i> 4670 from a sponge                                     | [8]         |
| Trichosorbicillin D (20)                                       | Marine-derived <i>Trichoderma reesei</i> 4670 from a sponge                                     | [8]         |
| 12-Hydroxysorbicillin (21)                                     | Marine-derived <i>Trichoderma reesei</i> 4670 from a sponge                                     | [8]         |
| 8,9-Dihydro-12-hydroxysorbicillin (22)                         | Marine-derived <i>Trichoderma reesei</i> 4670 from a sponge                                     | [8]         |
| Trichosorbicillin E (23)                                       | Marine-derived <i>Trichoderma reesei</i> 4670 from a sponge                                     | [8]         |
| Isotrichosorbicillin E (24)                                    | Marine-derived <i>Trichoderma reesei</i> 4670 from a sponge                                     | [8]         |
| Trichosorbicillin F (25)                                       | Marine-derived <i>Trichoderma reesei</i> 4670 from a sponge                                     | [8]         |
| Trichosorbicillin G (26)                                       | Marine-derived <i>Trichoderma reesei</i> 4670 from a sponge                                     | [8]         |
| Trichosorbicillin H (27)                                       | Marine-derived <i>Trichoderma reesei</i> 4670 from a sponge                                     | [8]         |
| 3-Methyltrichosorbicillin H (28)                               | Marine-derived <i>Trichoderma reesei</i> 4670 from a sponge                                     | [8]         |
| Trichosorbicillin I (29)                                       | Marine-derived <i>Trichoderma reesei</i> 4670 from a sponge                                     | [8]         |
| Trichoreeseione A (30)                                         | Marine derived <i>Trichoderma reesei</i> from a sponge                                          | [9]         |
| Trichoreeseione B (31)                                         | Marine derived <i>Trichoderma reesei</i> from a sponge                                          | [9]         |
| Trichoreesin A (32)                                            | Epiphytic fungus <i>Trichoderma reesi</i> Z56-8 from the marine brown alga <i>Sargassum</i> sp. | [10]        |
| Ustilanthracin A (33)                                          | Rice false smut pathogen <i>Ustilaginoidea virens</i>                                           | [11]        |
| Ustilanthracin B (34)                                          | Rice false smut pathogen <i>Ustilaginoidea virens</i>                                           | [11]        |

|                                 |                                                                                    |      |
|---------------------------------|------------------------------------------------------------------------------------|------|
| Ustinaphthalin (35)             | Rice false smut pathogen <i>Ustilaginoidea virens</i>                              | [11] |
| Ustisorbicillinol F (36)        | Rice false smut pathogen <i>Ustilaginoidea virens</i>                              | [6]  |
| (+)-(R)-Vertinolide (37)        | <i>Trichoderma citrinoviride</i> from indoor air                                   | [12] |
| (-)-(S)-Dihydrovertinolide (38) | Endophytic fungus <i>Clonostachys rosea</i> B5-2 from <i>Bruguiera gymnorrhiza</i> | [13] |

**Table S2.** Occurrence of the bisorbicillinoids (39–59) in fungi.

| Sorbicillinoid                                                    | Fungus and its Origin                                                                      | Ref. |
|-------------------------------------------------------------------|--------------------------------------------------------------------------------------------|------|
| Epitetrahydrotrichodimer ether (39)                               | <i>Penicillium</i> sp. SCSIO06871 from the deep-sea sediment                               | [2]  |
| Demethyldihydrotrichodimerol (40)                                 | <i>Penicillium</i> sp. SCSIO06871 from the deep-sea sediment                               | [2]  |
| Bisorbicillpyrone A (41)                                          | <i>Penicillium</i> sp. SCSIO06871 from the deep-sea sediment                               | [2]  |
| 10,11-Dihydrobislongiquinolide (42)                               | <i>Penicillium dipodomyis</i> YJ-11 from a marine sediment                                 | [14] |
| 10,11,16,17-Tetrahydrobislongiquinolide (43)                      | <i>Penicillium dipodomyis</i> YJ-11 from a marine sediment                                 | [14] |
| Saturnispol A =<br>15,24-Dihydroxybisvertinol (44)                | <i>Trichoderma saturnisporum</i> DI-IA from the marine sponge<br><i>Dictyonella incisa</i> | [5]  |
|                                                                   | Marine-derived <i>Trichoderma reesei</i> 4670 from a sponge                                | [8]  |
| Saturnispol B = 24-Hydroxybisvertinol (45)                        | <i>Trichoderma saturnisporum</i> DI-IA from the marine sponge<br><i>Dictyonella incisa</i> | [5]  |
|                                                                   | Marine-derived <i>Trichoderma reesei</i> 4670 from a sponge                                | [8]  |
|                                                                   | Marine derived <i>Trichoderma reesei</i> from an unidentified sponge                       | [9]  |
| Trichobisvertinol A (46)                                          | Marine-derived <i>Trichoderma reesei</i> 4670 from a sponge                                | [8]  |
| Trichobisvertinol B (47)                                          | Marine-derived <i>Trichoderma reesei</i> 4670 from a sponge                                | [8]  |
| Trichobisvertinol C (48)                                          | Marine-derived <i>Trichoderma reesei</i> 4670 from a sponge                                | [8]  |
| Trichobisvertinol D = Ustisorbicillinol A (49)                    | Marine-derived <i>Trichoderma reesei</i> 4670 from a sponge                                | [8]  |
|                                                                   | Rice false smut pathogen <i>Ustilaginoidea virens</i>                                      | [6]  |
| 12- <i>epi</i> -Trichobisvertinol D =<br>Ustisorbicillinol B (50) | Marine-derived <i>Trichoderma reesei</i> 4670 from a sponge                                | [8]  |
|                                                                   | Rice false smut pathogen <i>Ustilaginoidea virens</i>                                      | [6]  |
| Trichodermolide B (51)                                            | Marine derived <i>Trichoderma reesei</i> from a sponge                                     | [9]  |
| 13-Hydroxy-trichodermolide (52)                                   | Marine derived <i>Trichoderma reesei</i> from a sponge                                     | [9]  |
| 24-Hydroxy-trichodimerol (53)                                     | Marine derived <i>Trichoderma reesei</i> from a sponge                                     | [9]  |
| 15-Hydroxy-bisvertinol (54)                                       | Marine derived <i>Trichoderma reesei</i> from a sponge                                     | [9]  |
| 13-Hydroxy-dihydrotrichodermolide (55)                            | <i>Penicillium chrysogernum</i> 581F1 from the marine sponge <i>Theonella swinhoei</i>     | [15] |
| Ustilobisorbicillinol A (56)                                      | Rice false smut pathogen <i>Ustilaginoidea virens</i>                                      | [11] |
| Ustisorbicillinol C (57)                                          | Rice false smut pathogen <i>Ustilaginoidea virens</i>                                      | [6]  |
| Ustisorbicillinol D (548)                                         | Rice false smut pathogen <i>Ustilaginoidea virens</i>                                      | [6]  |
| Ustisorbicillinol E (59)                                          | Rice false smut pathogen <i>Ustilaginoidea virens</i>                                      | [6]  |

**Table S3.** Occurrence of the hybrid sorbicillinoids (61-73) in fungi.

| Sorbicillinoid                   | Fungus and its Origin                                                                      | Ref. |
|----------------------------------|--------------------------------------------------------------------------------------------|------|
| 10-Methylsorbiterrin A (61)      | <i>Penicillium</i> sp. SCSIO06871 from the deep-sea sediment                               | [2]  |
| Dihydrotrichodermolide acid (62) | <i>Penicillium</i> sp. SCSIO06871 from the deep-sea sediment                               | [2]  |
| Saturnispol C (63)               | <i>Trichoderma saturnisporum</i> DI-IA from the marine sponge<br><i>Dictyonella incisa</i> | [5]  |
| Saturnispol D (64)               | <i>Trichoderma saturnisporum</i> DI-IA from the marine sponge<br><i>Dictyonella incisa</i> | [5]  |
| Spirosorbicillinol D (65)        | <i>Trichoderma longibrachiatum</i> SFC100166 isolated from the foreshore<br>soil           | [3]  |
| Sorbicatechol C (66)             | <i>Penicillium allii-sativi</i> from deep-sea                                              | [16] |
| Sorbicatechol D (67)             | <i>Penicillium allii-sativi</i> from deep-sea                                              | [16] |
| Sorbicillfuran A (68)            | Marine-derived fungus <i>Penicillium citrinum</i> SCSIO41402                               | [17] |
| Sorbicillfuran B (69)            | Marine-derived fungus <i>Penicillium citrinum</i> SCSIO41402                               | [17] |
| Sorbicillasin A (70)             | Deep-sea-derived fungus <i>Phialocephala</i> sp. FL30r                                     | [7]  |
| Sorbicillasin B (71)             | Deep-sea-derived fungus <i>Phialocephala</i> sp. FL30r                                     | [7]  |
| Tanshisorbicin (72)              | Addition of tanshinone IIA in the fermentation broth of <i>Hypocrea</i><br>sp.             | [18] |
| Trichosorbicillin A (73)         | Marine-derived <i>Trichoderma reesei</i> 4670 from a sponge                                | [8]  |

**Table S4.** Cytotoxic activity of the screened sorbicillinoids from fungi.

| Sorbicillinoid                  | Cytotoxic Activity                                            | Ref. |
|---------------------------------|---------------------------------------------------------------|------|
| Sorbicillin (1)                 | Cytotoxicity against the human hepatocellular carcinoma cells | [19] |
|                                 | Antiproliferative activity on HT-29 cells                     | [16] |
| 24-Hydroxy-trichodimerol (53)   | Cytotoxic activities on human tumor cells                     | [16] |
| Ustilobisorbicillinol A (56)    | Induced cell cycle arrest, and promoted apoptosis             | [11] |
| Sorbicatechol D (67)            | Antiproliferative activity on HT-29 cells                     | [16] |
| Sorbicillfuran B (69)           | Weak cytotoxicity against HL-60 cells                         | [17] |
| Trichodimerol (74)              | Moderate cytotoxic activities on human carcinoma cells        | [6]  |
| Demethyltrichodimerol (75)      | Moderate cytotoxic activities on human carcinoma cells        | [6]  |
| Dihydrotrichodimer ether A (76) | Moderate cytotoxic activities on human carcinoma cells        | [6]  |
| Bisvertinolone (77)             | Moderate cytotoxic activities on human carcinoma cells        | [6]  |

**Table S5.** Antibacterial activity of the screened sorbicillinoids from fungi.

| <b>Sorbicillinoid</b>                                             | <b>Antibacterial Activity</b>                                                                   | <b>Ref.</b> |
|-------------------------------------------------------------------|-------------------------------------------------------------------------------------------------|-------------|
| Saturnispol F (9)                                                 | Antibacterial activity on <i>A. aureus</i> , VRE, <i>P. aeruginosa</i> and <i>K. pneumoniae</i> | [5]         |
| Saturnispol H (11)                                                | Antibacterial activity on VRE and <i>B. subtilis</i>                                            | [5]         |
| Ustisorbicillinol B =<br>12- <i>epi</i> -Trichobisvertinol D (50) | Antibacterial activity against human/plant pathogenic bacteria                                  | [6]         |
| Tanshisorbicin (72)                                               | Antibacterial activity                                                                          | [18]        |
| Demethyltrichodimerol (75)                                        | Antibacterial activity against human/plant pathogenic bacteria                                  | [6]         |
| Dihydrotrichodimer ether A<br>(76)                                | Antibacterial activity against human/plant pathogenic bacteria                                  | [6]         |
| Bisvertinolone (77)                                               | Antibacterial activity on <i>Staphylococcus aureus</i>                                          | [20]        |
|                                                                   | Antibacterial activity on <i>Escherichia coli</i> and <i>Pseudomonas lachrymans</i>             | [21]        |
|                                                                   | Antibacterial activity against human/plant pathogenic bacteria                                  | [6]         |
| Sohirnone A (78)                                                  | Antibacterial activity                                                                          | [2]         |
| Dihydrodemethylsorbicillin<br>(79)                                | Antibacterial activity                                                                          | [2]         |
| Bislongiquinolide (80)                                            | Antibacterial activity on <i>Escherichia coli</i> and <i>Pseudomonas lachrymans</i>             | [21]        |
| Oxosorbicillinol (81)                                             | Antibacterial activity against human/plant pathogenic bacteria                                  | [6]         |

**Table S6.** Antifungal activity of the screened sorbicillinoids from fungi.

| <b>Sorbicillinoid</b>      | <b>Antifungal Activity</b>                                                                                                              | <b>Ref.</b> |
|----------------------------|-----------------------------------------------------------------------------------------------------------------------------------------|-------------|
| Sorbicillin (1)            | Antifungal activity on <i>Candida albicans</i>                                                                                          | [19]        |
| Demethyltrichodimerol (75) | Inhibition against the spore germination of rice blast pathogen <i>Magnaporthe oryzae</i>                                               | [6]         |
| Bisvertinolone (77)        | Inhibition against the spore germination of rice blast pathogen <i>Magnaporthe oryzae</i>                                               | [6]         |
|                            | Antifungal activity on phytopathogenic fungi <i>Cladosporium coccodes</i> , <i>Magnaporthe oryzae</i> and <i>Phytophthora infestans</i> | [3]         |
| Oxosorbicillinol (81)      | Inhibition against the spore germination of rice blast pathogen <i>Magnaporthe oryzae</i>                                               | [6]         |
|                            | Antifungal activity on phytopathogenic fungi <i>Cladosporium coccodes</i> , <i>Magnaporthe oryzae</i> and <i>Phytophthora infestans</i> | [3]         |
| Bisorbicillinol (82)       | Antifungal activity on phytopathogenic fungi <i>Cladosporium coccodes</i> , <i>Magnaporthe oryzae</i> and <i>Phytophthora infestans</i> | [3]         |
| Epoxyorbicillinol (83)     | Antifungal activity on phytopathogenic fungi <i>Cladosporium coccodes</i> , <i>Magnaporthe oryzae</i> and <i>Phytophthora infestans</i> | [3]         |

**Table S7.** Anti-inflammatory activity of the screened sorbicillinoids from fungi.

| Sorbicillinoid                                                                         | Anti-Inflammatory Activity                                                                      | Ref. |
|----------------------------------------------------------------------------------------|-------------------------------------------------------------------------------------------------|------|
| 2',3'-Dihydrosorbicillin = Dihydrosorbicillin (2)                                      | Inhibition of NO production in RAW264.7 cells activated by LPS                                  | [8]  |
| Trichosorbicillin B (18)                                                               | Inhibition of NO production in RAW264.7 cells activated by LPS                                  | [8]  |
| Trichosorbicillin C (19)                                                               | Inhibition of NO production in RAW264.7 cells activated by LPS                                  | [8]  |
| 12-Hydroxysorbicillin (21)                                                             | Inhibition of NO production in RAW264.7 cells activated by LPS                                  | [8]  |
| 8,9-Dihydro-12-hydroxysorbicillin (22)                                                 | Inhibition of NO production in RAW264.7 cells activated by LPS                                  | [8]  |
| Trichosorbicillin E (23)                                                               | Inhibition of NO production in RAW264.7 cells activated by LPS                                  | [8]  |
| Isotrichosorbicillin E (24)                                                            | Inhibition of NO production in RAW264.7 cells activated by LPS                                  | [8]  |
| Trichosorbicillin F (25)                                                               | Inhibition of NO production in RAW264.7 cells activated by LPS                                  | [8]  |
| Trichosorbicillin I (29)                                                               | Inhibition of NO production in RAW264.7 cells activated by LPS                                  | [8]  |
| Epitetrahydrotrichodimer ether (39)                                                    | <i>Penicillium</i> sp. DM815 form the rhizosphere soil of mangrove<br><i>Hibiscus tiliaceus</i> | [4]  |
| 24-Hydroxybisvertinol (45)                                                             | Inhibition of NO production in RAW264.7 cells activated by LPS                                  | [8]  |
| Trichobisvertinol A (46)                                                               | Inhibition of NO production in RAW264.7 cells activated by LPS                                  | [8]  |
| Trichobisvertinol B (47)                                                               | Inhibition of NO production in RAW264.7 cells activated by LPS                                  | [8]  |
| Trichobisvertinol C (48)                                                               | Inhibition of NO production in RAW264.7 cells activated by LPS                                  | [8]  |
| Trichobisvertinol D (49)                                                               | Inhibition of NO production in RAW264.7 cells activated by LPS                                  | [8]  |
| 12- <i>epi</i> -Trichobisvertinol D (50)                                               | Inhibition of NO production in RAW264.7 cells activated by LPS                                  | [8]  |
| Trichodimerol (74)                                                                     | Neural anti-inflammatory activity                                                               | [22] |
| Sohirnone A (78)                                                                       | Inhibition of NO production in RAW264.7 cells activated by LPS                                  | [8]  |
| Sorrentanone (84)                                                                      | Neural anti-inflammatory activity                                                               | [22] |
| Bisvertinol (85)                                                                       | Inhibition of NO production in RAW264.7 cells activated by LPS                                  | [8]  |
| (2 <i>E</i> ,4 <i>E</i> )-1-(2,6-Dihydroxy-3,5-dimethylphenyl)hexa-2,4-dien-1-one (86) | Inhibition of NO production in RAW264.7 cells activated by LPS                                  | [8]  |
| Trichodermanone C (87)                                                                 | Inhibitory effect on nitrite production in LPS-stimulated macrophages                           | [23] |
| Tetrahydrotrichodimerol (88)                                                           | <i>Penicillium</i> sp. DM815 form the rhizosphere soil of mangrove<br><i>Hibiscus tiliaceus</i> | [4]  |

**Table S8.** Phytotoxic activity of the screened sorbicillinoids from fungi.

| Sorbicillinoid                  | Phytotoxic Activity                                                              | Ref. |
|---------------------------------|----------------------------------------------------------------------------------|------|
| (-)-(S)-Dihydrovertinolide (38) | Phytotoxic activity against lettuce seedlings                                    | [13] |
| Trichodimerol (74)              | Inhibition against the radicle and germ elongation of rice and lettuce seedlings | [6]  |
| Demethyltrichodimerol (75)      | Inhibition against the radicle and germ elongation of rice and lettuce seedlings | [6]  |
| Bisvertinolone (77)             | Inhibition against the radicle and germ elongation of rice and lettuce seedlings | [6]  |
| Bislongiquinolide (80)          | Inhibition against the radicle and germ elongation of rice and lettuce seedlings | [6]  |

**Table S9.**  $\alpha$ -Glucosidase inhibitory activity of the screened sorbicillinoids from fungi.

| Sorbicillinoid                                    | Biological Activity                       | Ref. |
|---------------------------------------------------|-------------------------------------------|------|
| 2',3'-Dihydrosorbicillin = Dihydrosorbicillin (2) | $\alpha$ -Glucosidase inhibitory activity | [24] |
| 5-Hydroxy-dihydrodemethylsorbicillin (15)         | $\alpha$ -Glucosidase inhibitory activity | [2]  |
| Bisorbicillipyron A (41)                          | $\alpha$ -Glucosidase inhibitory activity | [2]  |
| Dihydrodemethylsorbicillin (79)                   | $\alpha$ -Glucosidase inhibitory activity | [2]  |
| Tetrahydrotrichodimerol (88)                      | $\alpha$ -Glucosidase inhibitory activity | [2]  |
| Tetrahydrobisvertinolone (89)                     | $\alpha$ -Glucosidase inhibitory activity | [2]  |
| 10,11-Dihydrobisvertinolone (90)                  | $\alpha$ -Glucosidase inhibitory activity | [2]  |

**Table S10.** Other biological activities of the screened sorbicillinoids from fungi.

| Sorbicillinoid                                    | Biological Activity                                                                        | Ref. |
|---------------------------------------------------|--------------------------------------------------------------------------------------------|------|
| Sorbicillin (1)                                   | Inhibitory activity on acetylcholinesterase                                                | [24] |
|                                                   | Neuroprotective and neuritogenic activity                                                  | [25] |
| 2',3'-Dihydrosorbicillin = Dihydrosorbicillin (2) | Inhibitory activity on acetylcholinesterase                                                | [24] |
|                                                   | Inhibitory activity on protein tyrosine phosphatase 1B                                     | [26] |
| Scipyron K (14)                                   | Antioxidant activity                                                                       | [7]  |
| Trichoreesin A (32)                               | Antimicrobial activity against the marine algae                                            | [10] |
| 13-Hydroxy-dihydrotrichodermolide (55)            | Inhibitory activities on glucagon-like peptide-1 and eukaryotic elongation factor-2 kinase | [15] |
| 10,11,27,28-Tetrahydrotrisorbicillinone C (60)    | Inhibitory activities on glucagon-like peptide-1 and eukaryotic elongation factor-2 kinase | [15] |
| Sohirnone A (78)                                  | Inhibitory activity on protein tyrosine phosphatase 1B                                     | [26] |
| Bisorbicillinol (82)                              | Anti-allergic activity                                                                     | [27] |
| Sorrentanone (84)                                 | Anti-HIV activity                                                                          | [22] |
| Tetrahydrobisvertinolone (89)                     | Weak AChE inhibitory activity                                                              | [2]  |
| Tetrahydrotrichodimer ether (91)                  | Weak AChE inhibitory activity                                                              | [2]  |

### Supplementary References

- Jiang, C.-S.; Zhou, Z.-F.; Yang, X.-H.; Lan, L.-F.; Gu, Y.-C.; Ye, B.-P.; Guo, Y.-W. Antibacterial sorbicillin and diketopiperazines from the endogenous fungus *Penicillium* sp. GD6 associated Chinese mangrove *Bruguiera Gymnorhiza*. *Chin. J. Nat. Med.* **2018**, *16*, 358–365.
- Pang, X.; Zhou, X.; Lin, X.; Yang, B.; Tian, X.; Wang, J.; Xu, S.; Liu, Y. Structurally various sorbicillinoids from the deep-sea sediment derived fungus *Penicillium* sp. SCSIO06871. *Bioorg. Chem.* **2021**, *107*, 104600.
- Ngo, M.T.; Nguyen, M.V.; Han, J.W.; Park, M.S.; Kim, H.; Choi, G.J. *In vitro* and *in vivo* antifungal activity of sorbicillinoids produced by *Trichoderma Longibrachiatum*. *J. Fungi* **2021**, *7*, 428.
- Ding, W.; Wang, F.; Li, Q.; Xue, Y.; Dong, Z.; Tian, D.; Chen, M.; Zhang, Y.; Hong, K.; Tang, J. Isolation and characterization of anti-inflammatory sorbicillinoids from the mangrove-derived fungus *Penicillium* sp. DM815. *Chem. Biodivers.* **2021**, *18*, e2100229.
- Meng, J.; Cheng, W.; Heydari, H.; Wang, B.; Zhu, K.; Konuklugil, B.; Lin, W. Sorbicillinoid-based metabolites from a sponge-derived fungus *Trichoderma saturnisporum*. *Mar. Drugs* **2018**, *16*, 226.



6. Meng, J.; Gu, G.; Dang, P.; Zhang, X.; Wang, W.; Dai, J.; Liu, Y.; Lai, D.; Zhou, L. Sorbicillinoids from the fungus *Ustilaginoida virens* and their phytotoxic, cytotoxic, and antimicrobial activities. *Front. Chem.* **2019**, *7*, 435.
7. Zhang, Z.; He, Q.; Che, Q.; Zhang, G.; Zhu, T.; Gu, Q.; Li, D. Sorbicillasins A–B and scirpyrone K from a deep-sea-derived fungus, *Phialocephala* sp. FL30r. *Mar. Drugs* **2018**, *16*, 245.
8. Zhang, P.; Deng, Y.; Lin, X.; Chen, B.; Li, J.; Liu, H.; Chen, S.; Liu, L. Anti-inflammatory mono- and dimeric sorbicillinoids from the marine-derived fungus *Trichoderma reesei* 4670. *J. Nat. Prod.* **2019**, *82*, 947–957.
9. Rehman, S.U.; Yang, L.-J.; Zhang, Y.-H.; Wu, J.-S.; Shi, T.; Halder, W.; Shao, C.-L.; Wang, C.-Y. Sorbicillinoid derivatives from sponge-derived fungus *Trichoderma reesei* (HN-2016-018). *Front. Microbiol.* **2020**, *11*, 1334.
10. Ma, X.-Y.; Shi, Z.-Z.; Ji, N.-Y. Sorbicillinoids from the alga-epiphytic fungus *Trichoderma reesei* Z56-8. *Nat. Prod. Res.* **2021**. <https://doi.org/10.1080/14786419.2021.1980793>.
11. Lai, D.; Meng, J.; Zhang, X.; Xu, D.; Dai, J.; Zhou, L. Ustilobisorbicillinol A, a cytotoxic sorbyl-containing aromatic polyketide from *Ustilaginoida virens*. *Org. Lett.* **2019**, *21*, 1311–1314.
12. McMullin, D.R.; Renaud, J.B.; Barasubiye, T.; Sumarah, M.W.; Miller, J.D. Metabolites of *Trichoderma* species isolated from damp building materials. *Can. J. Microbiol.* **2017**, *63*, 621–632.
13. Supratman, U.; Suzuki, T.; Nakamura, T.; Yokoyama, Y.; Harneti, D.; Maharani, R.; Salam, S.; Abdullah, F.; Koseki, T.; Shiono, Y. New metabolites produced by endophyte *Clonostachys rosea* B5-2. *Nat. Prod. Res.* **2021**, *35*, 1525–1351.
14. Yu, J.; Han, H.; Zhang, X.; Ma, C.; Sun, C.; Che, Q.; Gu, Q.; Zhu, T.; Zhang, G.; Li, D. Discovery of two new sorbicillinoids by overexpression of the global regulator LaeA in a marine-derived fungus *Penicillium dipodomyis* YJ-11. *Mar. Drugs* **2019**, *17*, 446.
15. Cao, M.-J.; Zhu, T.; Liu, J.-T.; Ouyang, L.; Yang, F.; Lin, H.-W. New sorbicillinoid derivatives with GLP-1R and eEF2K affinities from a sponge-derived fungus *Penicillium Chrysogenum* 581F1. *Nat. Prod. Res.* **2020**, *34*, 2880–2886.
16. Xie, C.-L.; Zhang, D.; Lin, T.; He, Z.-H.; Yan, Q.-X.; Cai, Q.; Zhang, X.-K.; Yang, X.-W.; Chen, H.-F. Antiproliferative sorbicillinoids from the deep-sea-derived *Penicillium allii-sativii*. *Front. Microbiol.* **2021**, *11*, 636948.
17. Wang, J.; Li, K.; Luo, X.; Wu, Z.; Gu, T.; Liao, S.; Lin, X.; Yang, B.; Liu, Y.; Fang, W.; et al. Sorbicillfurans A and B, two novel sorbicillinoid adducts from the fungus *Penicillium citrinum* SCSIO41402. *Org. Biomol. Chem.* **2019**, *17*, 8721.
18. He, W.; Liu, M.; Li, X.; Zhang, X.; Abdel-Mageed, W.M.; Li, L.; Wang, W.; Zhang, J.; Han, J.; Dai, H.; et al. Fungal biotransformation of tanshinone results in [4+2] cycloaddition with sorbicillinol: Evidence for enzyme catalysis and increased antibacterial activity. *Appl. Microbiol. Biotechnol.* **2016**, *100*, 8349–8357.
19. Lin, S.; Wu, Y.-Z.; Chen, K.-Y.; Ye, J.; Yang, X.-W.; Zhang, W.-D. Polyketides from the fungus *Penicillium decumbens*. *J. Asian Nat. Prod. Res.* **2018**, *20*, 445–450.
20. Corral, P.; Esposito, F.P.; Tedesco, P.; Falco, A.; Tortorella, E.; Tartaglione, L.; Festa, C.; D'Auria, M.V.; Gnani, G.; Varese, G.C.; et al. Identification of a sorbicillinoid-producing *Aspergillus* strain with antimicrobial activity against *Staphylococcus aureus*: A new polyextremophilic marine fungus from Barents Sea. *Mar. Biotechnol.* **2018**, *20*, 502–511.
21. Meng, J.; Wang, B.; Cheng, W. Study on the secondary metabolites of *Thichoderma sturnisporum*. *Chin. J. Mar. Drugs* **2017**, *36*, 27–31.
22. Zhao, J.-L.; Zhang, M.; Liu, J.-M.; Tan, Z.; Chen, R.-D.; Xie, K.-B.; Dai, J.-G. Bioactive steroids and sorbicillinoids isolated from the endophytic fungus *Trichoderma* sp. Xy24. *J. Asian Nat. Prod. Res.* **2017**, *19*, 1028–1035.
23. Marra, R.; Nicoletti, R.; Pagano, E.; DellaGreca, M.; Salvatore, M.M.; Borrelli, F.; Lombardi, N.; Vinale, F.; Woo, S.L.; Andolfi, A. Inhibitory effect of trichodermanone C, a sorbicillinoid produced by *Trichoderma citrinoviride* associated to the green alga *Cladophora* sp., on nitrite production in LPS-stimulated macrophages. *Nat. Prod. Res.* **2019**, *33*, 3389–3397.
24. Deng, J.; Dai, H.; Wang, Y.; Chen, H.; Tan, Z.; Mei, W. Isolation and identification of the fungus *Aspergillus* sp. HNWSW-20 from Chinese agarwood and its secondary metabolites. *Chin. J. Trop. Crops* **2018**, *39*, 1618–1624.



25. Tilki, E.K.; Ozturk, S.E.; Ozarda, M.G.; Canturk, Z.; Dikmen, M. Investigation of the neuroprotective and neuritogenic effects of halotolerant *Penicillium flavigenum*-derived sorbicillin-like compounds on PC-12 Adh cells. *Cytotechnology* **2021**, *73*, 801–813.
26. Han, X.; Tang, X.; Qiao, D.; Li, P.; Li, G. Studies on bioactive components of a marine-derived fungus *Penicillium chrysogenum*. *Chin. J. Mar. Drugs* **2019**, *38*, 77–81.
27. Sugaya, K.; Terajima, T.; Takahashi, A.; Onose, J.; Abe, N. Bisorbicillinol inhibits Lyn tyrosine kinase for allergic response on RBL-2H3 cells. *Bioorg. Med. Chem. Lett.* **2019**, *29*, 832–835.
